# Supplementary material
Source: PubMed Central journal article supplement (PMC6849938)
Supplement: baADV2019000722-suppl1.pdf [file baADV2019000722-suppl1.pdf]

Supplemental Table 1.

Risk factors associated with survival, acute and chronic GVHD after HLA-matched unrelated donor transplant

| Outcomes                        | Hazard Ratio<br>(95% confidence interval) | P-value |
|---------------------------------|-------------------------------------------|---------|
| Overall survival                |                                           |         |
| <i>Conditioning regimen</i>     |                                           |         |
| TBI 200 cGy/Cy/ATG              | 1.00                                      |         |
| TBI 200 cGy/Cy/Fludarabine/ATG  | 1.29 (0.65 – 2.56)                        | 0.45    |
| Cy/Fludarabine/ATG              | 1.57 (0.76 – 3.22)                        | 0.22    |
| Cy/ATG                          | 1.10 (0.49 – 2.44)                        | 0.82    |
| <i>Age</i>                      |                                           |         |
| <30 years                       | 1.00                                      |         |
| ≥30 years                       | 2.72 (1.64 – 4.52)                        | <0.001  |
| <i>ATG source</i>               |                                           |         |
| Equine (h-ATG)                  | 1.00                                      |         |
| Rabbit (r-ATG)                  | 0.55 (0.28 – 1.08)                        | 0.08    |
| <i>Grade II-IV acute GVHD</i>   |                                           |         |
| <i>Conditioning regimen</i>     |                                           |         |
| TBI 200 cGy/Cy/ATG              | 1.00                                      |         |
| TBI 200 cGy/Cy/Fludarabine/ATG  | 0.49 (0.26 – 0.94)                        | 0.03    |
| Cy/Fludarabine/ATG              | 0.46 (0.21 – 0.99)                        | 0.05    |
| Cy/ATG                          | 0.76 (0.35 – 1.67)                        | 0.49    |
| <i>ATG source</i>               |                                           |         |
| Equine (h-ATG)                  | 1.00                                      |         |
| Rabbit (r-ATG)                  | 0.41 (0.22 – 0.76)                        | <0.001  |
| Chronic GVHD                    |                                           |         |
| <i>Conditioning regimen</i>     |                                           |         |
| TBI 200 cGy/Cy/ATG              | 1.00                                      |         |
| TBI 200 cGy/Cy/Fludarabine/ATG  | 1.07 (0.68 – 1.68)                        | 0.76    |
| Cy/Fludarabine/ATG              | 0.93 (0.52 – 1.65)                        | 0.79    |
| Cy/ATG                          | 0.86 (0.45 – 1.66)                        | 0.66    |
| <i>Age</i>                      |                                           |         |
| <30 years                       | 1.00                                      |         |
| ≥30 years                       | 1.62 (1.08 – 2.41)                        | 0.02    |
| <i>GVHD prophylaxis</i>         |                                           |         |
| CNI + methotrexate              | 1.00                                      |         |
| CNI alone / CNI + mycophenolate | 1.89 (1.18 – 3.02)                        | 0.008   |

Abbreviations: ATG = anti-thymocyte globulin; GVHD = graft versus host disease
